1 **A nonsense mutation of bone morphogenetic protein-15**  
2 **(BMP15) causes both infertility and increased litter size**  
3 **in pigs.**

4 Gabriele Flossmann<sup>1,\*</sup>, Christine Wurmser<sup>1</sup>, Hubert Pausch<sup>1,2</sup>, Amabel Tenghe<sup>1</sup>, Jörg  
5 Dodenhoff<sup>3</sup>, Günther Dahinten<sup>3</sup>, Kay-Uwe Götz<sup>3</sup>, Ingolf Russ<sup>4</sup>, Ruedi Fries<sup>1</sup>

6

7 <sup>1</sup> Lehrstuhl für Tierzucht, Technische Universität München, Freising, Germany

8 <sup>2</sup> Animal Genomics, ETH Zürich, Zürich, Switzerland

9 <sup>3</sup> Institut für Tierzucht, Bayerische Landesanstalt für Landwirtschaft, Poing, Germany

10 <sup>4</sup> Tierzuchtforschung e. V. München, Poing, Germany

11

12 \* Corresponding author

## 13 **Abstract**

### 14 **Background**

15 Atypical external genitalia are often a sign of reproductive organ pathologies and infertility  
16 with both environmental or genetic causes, including karyotypic abnormalities. Genome-  
17 wide association studies (GWAS) provide a means for identifying chromosomal regions  
18 harboring deleterious DNA-variants causing such phenotypes. We performed a GWAS to  
19 unravel the causes of incidental cases of atypically small vulvae in German Landrace gilts.

### 20 **Results**

21 A case-control GWAS involving Illumina porcine SNP60 BeadChip-called genotypes of 17  
22 gilts with atypically small vulvae and 1,818 control animals (fertile German Landrace sows)  
23 identified a significantly associated region on the X-chromosome ( $P = 8.81 \times 10^{-43}$ ).  
24 Inspection of whole-genome sequencing data in the critical area allowed us to pinpoint a  
25 likely causal variant in the form of a nonsense mutation of bone morphogenetic protein-15  
26 (Sscrofa11.1\_X:g.44618787C>T, BMP15:p.R212X). The mutant allele occurs at a  
27 frequency of 6.2% in the German Landrace breeding population. Homozygous gilts exhibit  
28 underdeveloped, most likely not functional ovaries and are not fertile. Male carriers do not  
29 seem to manifest defects. Heterozygous sows produce  $0.41 \pm 0.02$  ( $P = 4.5 \times 10^{-83}$ ) piglets  
30 more than wildtype animals. However, the mutant allele's positive effect on litter size  
31 accompanies a negative impact on lean meat growth.

### 32 **Conclusion**

33 Our results provide an example for the power of GWAS in identifying the genetic causes of  
34 a fuzzy phenotype and add to the list of natural deleterious BMP15 mutations that affect  
35 fertility in a dosage-dependent manner, the first time in a poly-ovulatory species. We  
36 advise eradicating the mutant allele from the German Landrace breeding population since

37 the adverse effects on the lean meat growth outweigh the larger litter size in heterozygous  
38 sows.

## 39 **Keywords**

40 Swine, German Landrace, GWAS, fertility, *BMP15*

41

## 42 **Background**

43 A number of German Landrace sows with atypically small vulvae have been recently  
44 observed on several Bavarian farms. Most of the sows turned out to be anoestrous or,  
45 when they showed signs of oestrus, insemination was not possible due to problems in  
46 introducing the artificial insemination device. Usually, more than one gilt of a litter was  
47 affected by the abnormality but not all. Although environmental factors such as mycotoxin  
48 intoxication or nutritional deficiencies could not be ruled out to cause the observed  
49 condition, we presumed a genetic etiology. Abnormal external genitalia are often seen in  
50 the context of intersexuality. Karyotypically female pigs (38, XX) have been reported with  
51 phenotypes ranging from complete external masculinization with testes to an external  
52 female appearance with enlarged clitorises, testes, and ovotestes [1]. A genome-wide  
53 association study pointed to the causal implication of *SOX9* in the sex-reversal phenotype  
54 of these SRY-negative XX pigs [2]. To explore possible genetic causes of the newly  
55 observed phenotype of abnormal female genitalia we also undertook a genome-wide case-  
56 control study that led us to a nonsense mutation in *BMP15*, most likely the cause for the  
57 abnormality in homozygously affected animals but also for increased litter size in  
58 heterozygous sows.

## 59 **Results**

### 60 **Genome-wide association study**

61 We had access to tissue samples of 43 German Landrace gilts, considered as affected  
62 based on their abnormally small vulvae. The 43 affected animals originated from 21 litters  
63 of 20 sows and 11 known boars and were from four breeding units; the sire of one litter  
64 was unknown (Additional file 1). Samples from 17 affected individuals were genotyped on  
65 the Illumina Porcine SNP60 BeadChip and subjected as cases to a genome-wide  
66 association study (GWAS) with 1,818 fertile sows from the Bavarian German Landrace  
67 population as controls. Association testing revealed a cluster of 18 significantly associated  
68 SNPs ( $P < 9.87 \times 10^{-7}$ ) between 38.6 Mb and 108.7 Mb on the X-chromosome (Figure 1a).  
69 The most significant SNP ( $P = 8.81 \times 10^{-43}$ ) on the X-chromosome (rs328794518,  
70 88,499,366 bp, Sscrofa11.1 assembly) was an intron variant in the  
71 *ENSSSCG00000012566* gene. We considered significantly associated, scattered SNPs on  
72 other chromosomes as artifacts due to the inflation of significant signals ( $\lambda = 1.26$ , Figure  
73 1b).

#### 74 **Identification of the underlying mutation by analyzing whole-genome re-sequencing** 75 **(WGS) data**

76 Re-sequencing data of 42 pigs (22 German Landrace and 20 Piétrain boars and fertile  
77 sows) were available for identifying possible causal variants. The sire of eight affected gilts  
78 was among the 42 sequenced pigs. We located 828 coding variants within the associated  
79 region (38.6 Mb to 108.7 Mb), of which 366 were missense mutations, 30 were frameshift  
80 variants, and five were nonsense-mutations. The sire of the affected gilts was hemizygous  
81 for one of the five nonsense-mutations. This nonsense-mutation, with no previous reports,  
82 is a C to T substitution in the second exon of *BMP15* (Sscrofa11.1\_X:g.44618787C>T,  
83 NP\_001005155.2:p.R212X). In addition to the sire of affected gilts, two German Landrace  
84 boars and one German Landrace sow were carriers of the nonsense-mutation (Additional  
85 file 2). None of the Piétrain pigs carried the mutation.

86 **Validation of the nonsense mutation in *BMP15***

87 All 22 German Landrace pigs with whole-genome sequences were genotyped by Sanger  
88 sequencing to confirm the mutation technically (Additional file 3). Complete concordance  
89 with WGS derived genotypes corroborates the technical validity of the variant. Next, we  
90 genotyped 43 sows, assessed by the farmers to exhibit small vulvae, 29 full siblings with  
91 normal vulvae, and 4,869 fertile sows, using either a KASP™ genotyping assay or a new  
92 customized version of the Illumina Porcine SNP60 BeadChip containing the p.R212X  
93 variant of *BMP15*. Of the 43 sows with abnormal vulvae, 36 were homozygous for the T-  
94 allele, three were heterozygous (C/T), and four were homozygous for the wild type allele  
95 (C). Of the seventeen animals that we considered as cases in the GWAS, only eleven  
96 turned out to be homozygous for the mutant allele; three animals were heterozygous and  
97 three animals were homozygous for the wildtype allele. None of the 4,869 fertile sows and  
98 none of the 29 unaffected full siblings of affected gilts were homozygous for the T-allele  
99 (Table 1). The frequency of the T-allele in the 4,869 fertile sows was 0.062.

100 **Table 1:** Genotypes of the p.R212X variant of *BMP15* for 4,941 German Landrace sows

| <b>Genotype</b>      | <b>Sows with small vulvae</b> | <b>Full siblings with normal vulvae</b> | <b>Fertile German Landrace sows</b> |
|----------------------|-------------------------------|-----------------------------------------|-------------------------------------|
| <b>C/C</b> (ref/ref) | 4                             | 0                                       | 4,263                               |
| <b>C/T</b> (ref/alt) | 3                             | 29                                      | 606                                 |
| <b>T/T</b> (alt/alt) | 36                            | 0                                       | 0                                   |
| <b>N sows</b>        | 43                            | 29                                      | 4,869                               |

101

102 While fertile sows and gilts that were classified to have normal-sized vulvae were not  
103 homozygous for the nonsense mutation of *BMP15*, seven of the 43 presumably affected  
104 gilts carried one or two wild type alleles. This finding is not compatible with the hypothesis

105 of the nonsense mutation causing small vulvae. However, assessing the size of the vulva  
106 is subjective, and the discrimination between affected and unaffected animals is prone to  
107 error. On the other hand, if an animal's status is assessed based on the objective criterium  
108 of fertility (i.e., an animal having one or more litters), the hypothesis that the nonsense  
109 mutation of *BMP15* causes underdeveloped external sexual organs and consequent  
110 infertility remains valid.

### 111 **Effect of the mutation on reproductive organs**

112 The initial phenotyping consisted of on-farm observations of gilts with underdeveloped  
113 vulvae. A more thorough assessment of the phenotype in the field turned out to be  
114 impracticable. Therefore, we acquired two gilts that were heterozygous for  
115 *BMP15*:p.R212X and mated them on an experimental farm with a boar carrying the  
116 mutation. One of the resulting litters consisted of male piglets only, while the other litter  
117 consisted of thirteen piglets, ten of them female. Of the female piglets, five were  
118 homozygous for the T-allele, and five were heterozygous (C/T). At the age of six months,  
119 eight of the ten female pigs (five homozygous and three heterozygous) were slaughtered,  
120 and their uteri and ovaries resected. The uterus horns of the homozygous animals were  
121 considerably smaller, specifically less voluminous (Figure 2a, b, c) or less coiled (Figure 2d  
122 and e) than those of their heterozygous full siblings (Figure 2f, g, h). The differences in the  
123 appearance of the ovaries were even more pronounced. As shown in Figure 3, the ovaries  
124 of homozygous gilts (Figure 3a to e) did not exhibit follicles, whereas multiple follicles were  
125 evident in the ovaries of their heterozygous full siblings (Figure 3f to h). Besides the  
126 morphologically assessed underdevelopment of the ovaries and uteri, there may also be  
127 functional deficits as indicated by cysts in two homozygously affected gilts (Figure 3d and  
128 e). It is noteworthy that the two gilts with cysts exhibit uterus horns that are more

129 voluminous (Figure 2d and e) than those of their homozygous siblings (Figure 2a, b, c), but  
130 less coiled than those of their heterozygous siblings (Figure 2f to h).

### 131 **Effects of the mutation on fertility and other economically important breeding traits**

132 Nonsense and missense mutations of *BMP15* increase ovulation rate in heterozygous  
133 ewes but cause infertility in ewes that are homozygous for the mutant allele (first reported  
134 by Galloway et al. (2000) [3]). Therefore, we analyzed the effects of the *BMP15* nonsense  
135 mutation (i. e., the T-allele) on fertility, measured as the number of live-born piglets, and  
136 several other economically important traits, most of them growth-related. Since genotypes  
137 were not available for all sows with breeding values, we derived the T-allele dosage based  
138 on the parents' genotypes and the T-allele frequencies in male and female animals. A total  
139 of 5,263 genotyped parents were available (4,263 C/C-sows, 606 C/T-sows, 367 C-boars,  
140 and 27 T-boars; T/T-females cannot be parents as they are infertile). The frequency of the  
141 T-allele amounts to  $q_m = 0.069$  in male, and  $q_f = 0.062$  in female parents. Table 2 lists the  
142 expected dosages and Table 3 the number of animals in each dosage group.

143

144 **Table 2:** Dosage of the T-allele (causing the nonsense mutation) based on the genotypes  
145 of the parents

|               | <b>C/C-sow</b> | <b>C/T-sow</b>      | <b>C/N-sow</b>      |
|---------------|----------------|---------------------|---------------------|
| <b>C-boar</b> | 0              | 0.5                 | $q_f = 0.062$       |
| <b>T-boar</b> | 1              | 1                   | 1                   |
| <b>N-boar</b> | $q_m = 0.069$  | $q_m + 0.5 = 0.569$ | $q_m + q_f = 0.131$ |

146  $q_m$ : T-allele frequency in boars;  $q_f$ : T-allele frequency in sows; C: wildtype allele; T: mutant  
147 allele; N: allele not known.

148

149

150

151 **Table 3:** Number of sows in T-allele dosage groups

|               | T-allele dosage  |                  |                  |                  |                  |              |                |
|---------------|------------------|------------------|------------------|------------------|------------------|--------------|----------------|
|               | 0.000            | 0.062            | 0.069            | 0.131            | 0.500            | 0.569        | 1.000          |
| <b>N sows</b> | 8,400<br>(4,156) | 9,623<br>(9,623) | 1,092<br>(1,092) | 9,969<br>(9,969) | 1,185<br>(1,185) | 565<br>(565) | 1,185<br>(579) |

152 Numbers in parentheses indicate animals with allele dosage derived from the parents'  
153 genotypes.

154 We applied a linear regression model to estimate the effect of the T-allele of the *BMP15*  
155 nonsense mutation on breeding values (Table 4). The T-allele has a significantly positive  
156 effect on the number of live-born piglets (+0.41 piglets). Thus, the *BMP15* mutation  
157 increases the litter size, probably as a result of an increased ovulation rate, and causes  
158 infertility in a dosage-sensitive manner (one T-allele increases the litter size, two T-alleles  
159 cause infertility). The positive effect of the *BMP15* mutation on litter size is contrasted by  
160 the significantly negative effect on traits of lean meat growth (lean meat content, belly  
161 meat content, loin eye area, loin to fat ratio) and the positively correlated feed conversion  
162 ratio. Intramuscular fat content is negatively correlated with lean meat growth and thus  
163 positively affected by the *BMP15* mutation.

164 **Table 4:** Estimated effects of the p.R212X-mutation on economically important traits

| Trait                                                     | N sows | Effect<br>± std. error | P-value                  | Signifi-<br>cance |
|-----------------------------------------------------------|--------|------------------------|--------------------------|-------------------|
| <b>Live-born piglets (N)</b>                              | 20,549 | +0.411 ± 0.021         | 4.50 × 10 <sup>-83</sup> | ****              |
| <b>Feed conversion ratio (kg/kg)</b>                      | 10,072 | -0.028 ± 0.004         | 7.60 × 10 <sup>-15</sup> | ****              |
| <b>Daily gain (g/day)</b>                                 | 10,072 | -0.847 ± 1.684         | 6.15 × 10 <sup>-01</sup> |                   |
| <b>Lean meat content (%)</b>                              | 10,072 | -0.889 ± 0.059         | 2.50 × 10 <sup>-51</sup> | ****              |
| <b>Belly meat content (%)</b>                             | 10,072 | -0.906 ± 0.057         | 2.21 × 10 <sup>-56</sup> | ****              |
| <b>Loin eye area (cm<sup>2</sup>)</b>                     | 10,072 | -1.216 ± 0.097         | 1.12 × 10 <sup>-35</sup> | ****              |
| <b>Loin to fat ratio (cm<sup>2</sup>/ cm<sup>2</sup>)</b> | 10,072 | -0.031 ± 0.002         | 1.06 × 10 <sup>-51</sup> | ****              |



|                                      |        |                |                               |
|--------------------------------------|--------|----------------|-------------------------------|
| <b>Carcass length (cm)</b>           | 10,072 | -0.030 ± 0.045 | 5.13 × 10 <sup>-01</sup>      |
| <b>Intramuscular fat content (%)</b> | 10,072 | 0.068 ± 0.007  | 6.20 × 10 <sup>-25</sup> **** |
| <b>pH1</b>                           | 10,072 | 0.002 ± 0.002  | 1.16 × 10 <sup>-01</sup>      |
| <b>Drip loss (%)</b>                 | 10,072 | -0.005 ± 0.004 | 2.16 × 10 <sup>-01</sup>      |

165 N sows: number of sows with a breeding value reliability ≥ 40%; Bonferroni corrected  
166 significance for eleven tests is P-value ≤ 4.5 × 10<sup>-03</sup>. \*\*\*\* significant at P ≤ 1 × 10<sup>-04</sup>

167

## 168 Discussion

169 Identifying genetic determinants of subjectively assessed phenotypes, such as gilts' vulvae  
170 size, seems hardly feasible. However, comparing the genotypes of seventeen gilts  
171 exhibiting relatively small vulvae with those of fertile sows enabled us to identify a distinct  
172 region on the X-chromosome to carry a potential causal mutation in a genome-wide  
173 association study. The availability of whole-genome sequence information of ancestors of  
174 the affected animals enabled us to readily identifying a likely causal variant, i.e. a  
175 nonsense mutation in *BMP15*.

176 Only eleven of the seventeen animals with apparently small vulvae that we considered as  
177 cases in the GWAS turned out to be homozygous for the mutant allele. This finding  
178 demonstrates the power of GWAS for identifying genetic causes even of a poorly  
179 phenotype, such as vulva size. Several factors affect their appearance. Vulvae are smaller  
180 in pre- than in postpubescent gilts, and the age of puberty varies considerably between  
181 animals [4]. A more reliable assessment of the vulva size as a possible indicator of  
182 follicular development would require the inspection of postpubescent gilts [5], which was  
183 not feasible for the present study.

184 *BMP15* has fundamental roles in ovarian function. Its actions include (1) promotion of  
185 follicle growth and maturation; (2) regulation of the sensitivity of granulosa cells (GC) to

186 follicle stimulation hormone (FSH); (3) prevention of GC apoptosis; (4) promotion of oocyte  
187 developmental competence and (5) determination of ovulation quota [6]. Natural mutations  
188 of *BMP15* cause primary ovarian insufficiency (POI) in women (reviewed by Patiño et al.,  
189 2017) [7]). Natural missense and nonsense mutations of ovine *BMP15* cause both an  
190 increased ovulation rate and infertility, depending on the dosage of the mutant allele [3, 8–  
191 12]. Notable exceptions are missense mutations of *BMP15* in the Grivette and Olkuska  
192 sheep breeds, as they do not cause infertility. They increase the ovulation rate and the  
193 litter size in a dosage-dependent manner without causing infertility [12]. *BMP15* acts  
194 through homodimerization of the mature protein and heterodimerization with GDF9 (growth  
195 differentiation factor 9), another member of the transforming growth factor  $\beta$  (TGF- $\beta$ ) family  
196 [13]. Mutations of *GDF9* also affect fertility in sheep in the same mode as mutations of  
197 *BMP15* [8, 14, 15]. A mutation of the bone morphogenetic protein IB receptor (*BMPRI1B*),  
198 finally, causes the high prolificacy Booroola phenotype [16–18] without a negative effect in  
199 the homozygous state.

200 While mutations of *BMP15* critically affect follicular development and ovulation rate in  
201 dosage-sensitive manners in the mono-ovulatory human and ovine species, the effects of  
202 such mutations seem to be less pronounced in the poly-ovulatory species mouse. *BMP15*-  
203 knockout female mice have minimal ovarian histopathological defects but are subfertile  
204 due to a decreased ovulation rate [19]. However, knockdown of *BMP15* in the poly-  
205 ovulatory species swine completely inhibits ovarian follicular development, leading to  
206 infertility [20]. This latter study did not allow to assess the effect of the null allele's  
207 heterozygous state on the ovulation rate and litter size. The natural nonsense mutation of  
208 *BMP15* that we describe in the present study is most likely a null allele as it results in a  
209 severely truncated protein (47.5% are missing) and / or nonsense-mediated mRNA decay.  
210 Our data indicate that heterozygosity of a *BMP15* mutation also enhances litter size in

211 poly-ovulatory swine, just as has been amply reported in mono-ovulatory sheep. *GDF9*  
212 and *BMP15* mutations also seem to be more frequent in mothers of dizygotic twins than  
213 mothers of single infants or monozygotic twins [21], pointing to the possibility of an  
214 increased ovulation rate due to heterozygosity of deleterious variants in the human  
215 species as well.

216 Galloway et al. (2000) [3] set out to explain the paradoxical dosage effect of *BMP15* and  
217 *GDF9* mutations. They hypothesized that 50% of normal levels of the proteins might  
218 reduce granulosa cell mitosis and delay suppressive effects on plasma follicle-stimulating  
219 hormone (FSH) concentrations and that the concomitant reduction of the amount of steroid  
220 or inhibin would lead to the ovulation of an additional oocyte in mono-ovulatory species (or  
221 additional oocytes in poly-ovulatory species). McNatty et al. (2009) [22] showed that an  
222 earlier acquisition of responsiveness to the luteinizing hormone (LH) by granulosa cells in  
223 a higher proportion of follicles accounts for the higher ovulation-rate in heterozygous  
224 carriers of a *BMP15* mutation.

225 To increase the litter size is an objective of pig breeding. Breeding gilts that are  
226 heterozygous for the nonsense mutation of the *BMP15* mutation could expedite the  
227 breeding for increased litter size. In detail, German Landrace boars carrying the mutation  
228 could be mated with German Large White sows. Homozygous female littermates of these  
229 boars can be diagnosed by a DNA-test and directed to fattening. All crossbred gilts sired  
230 by these boars would be carriers of the mutation. Symptomatic homozygous crossbred  
231 progeny would not result in this crossbreeding scheme since German Large White animals  
232 do not carry the *BMP15* mutation (data not shown). When mated with Piétrain boars,  
233 crossbred sows will produce an increased number of piglets suitable for fattening.

234 The outlined selection scheme to achieve an increased litter size is only advisable if the  
235 *BMP15* mutation does not negatively affect other economically relevant traits. However,  
236 our data reveal a significantly negative effect of the *BMP15* mutation on traits of lean meat  
237 growth. We did not expect such an effect since the *BMP15* gene is expressed exclusively  
238 in oocytes, and the protein does not seem to have any other function than to control the  
239 development of follicles and ovulation [7, 21]. However, an indirect effect of a linked variant  
240 on traits of lean meat growth cannot formally be excluded. When taking the economic  
241 weights [23] for significantly affected traits into account, we can assess the effect of the  
242 *BMP15* mutation economically. Each additional live-born piglet has a monetary value of  
243 3.98 €, each kg less feed consumed per kg gain 22.70 €, and each percentage point of  
244 lean meat content 1.66 €, yielding a total monetary effect of the mutant allele of -0.48 € per  
245 finisher pig. Thus, using the *BMP15* mutation to increase litter size is not advisable, and  
246 the eradication of the mutant allele from the German Landrace population, if carefully  
247 executed with regard to the genetic diversity, should not cause losses.

248

## 249 **Conclusions**

250 The observation of gilts with atypically small vulvae prompted a genome-wide association  
251 study that led to the detection of an associated region on the X-chromosome. The  
252 inspection of whole-genome sequencing data allowed us to pinpoint a nonsense mutation  
253 of *BMP15* (Sscrofa11.1\_X:g.44618787C>T, NP\_001005155.2:p.R212X) as the most likely  
254 causal variant. Like mutations of the ovine *BMP15*, the porcine mutation affects female  
255 fertility in a dosage-dependent manner. Homozygous female carriers of the variant lack  
256 proper ovary function and are infertile; heterozygous sows produce +0.41 piglets per litter.  
257 Male animals are not afflicted. Thus, our findings show that the *BMP15* nonsense mutation

258 has similar effects in the poly-ovulatory species swine, as observed for deleterious *BMP15*  
259 mutations in the mono-ovulatory species sheep. The negative effect of the mutant allele on  
260 lean meat growth precludes using the variant for increasing the litter size by selective  
261 breeding. The recommendation is, therefore, to eradicate the *BMP15* allele from the  
262 German Landrace breed.

263

## 264 **Material and Methods**

### 265 **DNA extraction and genotyping**

266 DNA was extracted from tissue samples of affected animals, collected at slaughter with the  
267 DNeasy Blood and Tissue Kit (Qiagen, Germany). Genome-wide genotypes of these  
268 samples and control animals were obtained with the Illumina Porcine SNP60 BeadChip,  
269 using default parameters of Illumina's BeadStudio for genotype calling. The SNPs'  
270 chromosomal positions were according to the Sscrofa11.1 assembly [24]. Sanger-  
271 sequencing was used to validate the genotypes of the Sscrofa11.1\_X:g.44618787C>T  
272 candidate causal variant as derived from next-generation sequencing. Genomic PCR  
273 products obtained with primers 5'-CGCCATCAACTTCACCTAGC-3' (forward) and 5'-  
274 TCTGGGAAGAAGTTTGGCCT-3' (reverse) were sequenced using the BigDye®  
275 Terminator v1.1 Cycle Sequencing Kit (Thermo Fisher Scientific, Massachusetts, USA) on  
276 an ABI 3130xl Genetic Analyzer (Life Technologies, Carlifornia, USA) instrument. We  
277 customized a KASP™ genotyping assay (LGC Limited, UK) for typing the variant at the  
278 population level, using 5'-TCACAAGGGGCGCAGGGTTCTA-3' as common PCR primer,  
279 5'-GACACATGAAGCGGAGTCG-3' as primer for the wild type C-allele, and 5'-  
280 GCTGACACATGAAGCGGAGTCA-3' as primer for the mutant T-allele.

## 281 **Genome-wide association study (GWAS)**

282 We retained Porcine SNP60 BeadChip derived genotypes of SNPs positioned on the  
283 autosomes and the X-chromosome if the calling rates were higher than 90% and the minor  
284 allele frequency above 1% after quality control with PLINK v. 1.9 [25]. The final data set for  
285 the GWAS comprised 50,649 SNPs, 17 case-animals, and fertile 1,818 control-animals,  
286 i.e. sows with at least one litter. A linear mixed model assessed the association between a  
287 SNP and the phenotype (0, control; 1, case) by single-locus regression using  
288 the GCTA software [26] and the following model:

$$289 \quad y = a + bx + g + e,$$

290 where  $y$  is the phenotype (coded as 1 for affected and 0 for unaffected),  $a$  is the mean  
291 term,  $b$  is the additive effect (fixed effect) of the candidate SNP to be tested for  
292 association,  $x$  is the SNP genotype indicator variable coded as 0, 1 or 2,  $g$  is the polygenic  
293 effect (random effect), i.e., the accumulated effect of all SNPs (as captured by the GRM  
294 calculated using all SNPs) and  $e$  is the residual. We considered SNPs with P-values less  
295 than  $9.87 \times 10^{-7}$  as significantly associated (5% Bonferroni-corrected significance  
296 threshold for 50,649 independent tests). The inflation factor was calculated using  
297 the `estlambda` function of the R-package GenABEL [27].

## 298 **Whole-genome sequencing**

299 The genomes of 42 influential ancestors of two pig populations (22 German Landrace: 14  
300 boars and eight sows, 20 Piétrain: 18 boars and two sows) were sequenced to an  
301 average coverage of 12.68x (minimum: 7.90x, maximum: 16.05x). The sire of eight sows  
302 with atypically small vulvae had a coverage of 13.95x. Library preparation followed  
303 ultrasonic fragmentation (Covaris: 50 s, 5% duty factor) using the Illumina TruSeq DNA  
304 PCR-Free Sample Preparation Kit with an insert size of 350 bp. The libraries' sequencing

305 was in the 125 bp paired-end mode on the HiSeq2500 instrument (Illumina, San Diego,  
306 USA). The reads were aligned to the reference sequence (Sscrofa11.1) using the Burrow-  
307 Wheeler aligner (BWA) [28]. Variants were called with GATK [29] and visualized with the  
308 Integrative Genomics Viewer (IGV) [30]. The Ensembl Variant Effect Predictor (VEP) [31]  
309 was used to annotate the variants according to the RefSeq (v. 2017\_05) annotation of the  
310 Sscrofa11.1-assembly.

### 311 **Mating of animals carrying the mutation and inspection of ovaries and uteri in** 312 **female offspring**

313 Two gilts carrying the nonsense-allele of the BMP15:pR212X variant were acquired and  
314 raised on the experimental station Thalhausen of the Technical University of Munich. The  
315 gilts exhibited regular estrous cycles and were artificially inseminated at eight months' of  
316 age, with the semen of a boar also carrying the mutation. After normal gestation, one sow  
317 gave birth to only male piglets that we did not further consider for the study, and the other  
318 sow delivered thirteen piglets, ten of them female. Weaning of the litter was at the age of  
319 four weeks. The ten females stayed in a standard pen under standard rearing conditions  
320 until they reached three months and were then divided into two groups with five pigs each  
321 and further kept under standard conditions. We genotyped the animals at  
322 Sscrofa11.1\_X:g.44618787C>T with the KASP<sup>™</sup>-assay (see above) after blood samples  
323 were drawn at the age of 8 weeks and DNA was extracted by proteinase K treatment and  
324 the salting-out method. At six months of age, eight of the ten female pigs (five with T/T-  
325 and three with the C/T-genotype) were slaughtered. Uteri and ovaries were removed and  
326 examined.

### 327 **Deriving the T-allele's dosage of Sscrofa11.1\_X:g.44618787C>T in sows without** 328 **genotype information**

329 As genotypes were not available for all sows with breeding values, we derived genotypes  
330 from the parents' genotypes to increase the number of informative animals for studying the  
331 effects of the mutation. When taking the X-chromosomal inheritance of the *BMP15*  
332 mutation (Sscrofa11.1\_X:g.44618787C>T) into account, the following applies for female  
333 progeny: Parents that are C/C (sow) and C (boar) have C/C-progeny exclusively (dosage  
334 of T equals 0); if the mother is C/T and the boar is C, the progeny's dosage of T equals  
335 0.5. If the boar is C and the mother is not directly genotyped, i.e., either C/T or C/C (not  
336 T/T, as this genotype is not compatible with fertility), the dosage of the T-allele in the  
337 progeny amounts to the T-allele's frequency in the female population. If the boar's  
338 genotype is T, all resulting fertile females are C/T (dosage of T equals 1). If the boar has  
339 no genotype and the mother is C/C, the dosage of T in the progeny corresponds to the T-  
340 allele's frequency in the male population. If the mother is C/T, the resulting dosage of T in  
341 the progeny is 0.5 plus the male T-allele's frequency. Finally, if the boar and the sow lack  
342 direct genotype information, i.e., the sow is either C/C or C/T, the female progeny's T-allele  
343 dosage is the sum of the male and the female T-allele's frequency.

#### 344 **Estimating the T-allele's effect on breeding values**

345 We used the linear regression model of the statsmodels package [32] in the Python  
346 environment (v. 3.7 [33]) to estimate the effects of the mutant T-allele on breeding values:

$$347 \quad y = a + bx + e,$$

348 where  $y$  is estimated breeding value,  $a$  is the mean term,  $b$  is the additive effect of the T-  
349 allele,  $x$  is the T-allele dosage (0.000, 0.062, 0.069, 0.131, 0.500, 0.569, 1.00), and  $e$  is the  
350 residual. An effect was considered significant if  $P \leq 0.0045$  (the Bonferroni corrected  
351 significance level for eleven tests, i.e., breeding values). We considered only breeding  
352 values with a reliability of at least 40%.



## 353 **List of abbreviations**

- 354 BMP15: Bone morphogenetic protein 15
- 355 C-boar: boar hemizygous for the wildtype allele of the BMP15:p.R212X-mutation
- 356 C/C-sow: sow homozygous for the wildtype allele of the BMP15:p.R212X-mutation
- 357 C/N-sow: sow with unknown genotype for the BMP15:p.R212X-mutation
- 358 C/T-sow: sow carrying the BMP15:p.R212X-mutation in the heterozygous state
- 359 GWAS: Genome wide association study
- 360 N-boar: boar with unknown genotype for the BMP15:p.R212X-mutation
- 361 NM\_001005155.2:c.687C>T (BMP15:c687C>T)
- 362 NP\_001005155.2:p.R212X (BMP15:p.R212X)
- 363 SNP: Single nucleotide polymorphism
- 364 Sscrofa11.1\_X:g.44618787C>T
- 365 T-boar: boar hemizygous for the mutant allele of the BMP15:p.R212X-mutation

366

## 367 **Declarations**

### 368 **Ethics approval and consent to participate**

369 Ethics approval was obtained by the Regierung von Oberbayern (Sachgebiet 54) for taking  
370 blood samples from the female piglets of carrier matings and slaughter for examining the  
371 uteri and ovaries. Ethical approval was not necessary otherwise because analyses were  
372 performed on existing data obtained as part of routine data recording for the Bavarian pig  
373 breeding association.

### 374 **Consent for publication**

375 All authors have seen the manuscript and agree with the contents.

### 376 **Availability of data and materials**

377 All relevant data are included within the article and its additional files.

### 378 **Competing interests**

379 All authors declare that they have no competing interests.

### 380 **Funding**

381 We acknowledge funding of the projects InGeniS by the Bavarian Ministry of Nutrition,  
382 Agriculture and Forestry and FORTiGe (AZ-1300-17) by the Bavarian Research  
383 Foundation.

### 384 **Authors' contributions**

385 GF performed molecular-genetic analyses. CW and RF performed next generation  
386 sequencing and variant detection. GF, HP, AT and RF analyzed data. JD, GD and KUG  
387 provided breeding values and information on affected animals. IR provided genotype data.  
388 RF, HP and GF conceived the study. GF and RF wrote the manuscript.

### 389 **Acknowledgements**

390 We thank the owners of the affected animals for communicating their  
391 observations.

392

## 393 **References**

- 394 1. Pailhoux E, Pelliniemi L, Barbosa A, Parma P, Kuopio T, Cotinot C. Relevance of  
395 intersexuality to breeding and reproductive biotechnology programs; XX sex reversal in  
396 pigs. *Theriogenology*. 1997;47:93–102.
- 397 2. Rousseau S, Iannuccelli N, Mercat M-J, Naylies C, Thouly J-C, Servin B, et al. A  
398 genome-wide association study points out the causal implication of SOX9 in the sex-  
399 reversal phenotype in XX pigs. *PLoS ONE*. 2013;8:e79882.
- 400 3. Galloway SM, McNatty KP, Cambridge LM, Laitinen MP, Juengel JL, Jokiranta TS, et al.  
401 Mutations in an oocyte-derived growth factor gene (BMP15) cause increased ovulation  
402 rate and infertility in a dosage-sensitive manner. *Nat Genet*. 2000;25:279–83.
- 403 4. Knauer MT, Cassady JP, Newcom DW, See MT. Phenotypic and genetic correlations  
404 between gilt estrus, puberty, growth, composition, and structural conformation traits with  
405 first-litter reproductive measures. *J Anim Sci*. 2011;89:935–42.
- 406 5. Graves KL, Mordhorst BR, Wright EC, Hale BJ, Stalder KJ, Keating AF, et al.  
407 Identification of measures predictive of age of puberty onset in gilts. *Trans Anim Sci*.  
408 2020;4:285–92.
- 409 6. Persani L, Rossetti R, Di Pasquale E, Cacciatore C, Fabre S. The fundamental role of  
410 bone morphogenetic protein 15 in ovarian function and its involvement in female fertility  
411 disorders. *Hum Reprod Update*. 2014;20:869–83.
- 412 7. Patiño LC, Walton KL, Mueller TD, Johnson KE, Stocker W, Richani D, et al. BMP15  
413 Mutations Associated With Primary Ovarian Insufficiency Reduce Expression, Activity, or  
414 Synergy With GDF9. *J Clin Endocrinol Metab*. 2017;102:1009–19.
- 415 8. Hanrahan JP, Gregan SM, Mulsant P, Mullen M, Davis GH, Powell R, et al. Mutations in  
416 the genes for oocyte-derived growth factors GDF9 and BMP15 are associated with both  
417 increased ovulation rate and sterility in Cambridge and Belclare sheep (*Ovis aries*). *Biol*  
418 *Reprod*. 2004;70:900–9.
- 419 9. Bodin L, Di Pasquale E, Fabre S, Bontoux M, Monget P, Persani L, et al. A Novel  
420 Mutation in the Bone Morphogenetic Protein 15 Gene Causing Defective Protein Secretion  
421 Is Associated with Both Increased Ovulation Rate and Sterility in Lacaune Sheep.  
422 *Endocrinology*. 2007;148:393–400.
- 423 10. Martinez-Royo A, Jurado JJ, Smulders JP, Martí JI, Alabart JL, Roche A, et al. A  
424 deletion in the bone morphogenetic protein 15 gene causes sterility and increased  
425 prolificacy in Rasa Aragonesa sheep. *Anim Genet*. 2008;39:294–7.
- 426 11. Monteagudo LV, Ponz R, Tejedor MT, Laviña A, Sierra I. A 17 bp deletion in the Bone  
427 Morphogenetic Protein 15 (BMP15) gene is associated to increased prolificacy in the Rasa  
428 Aragonesa sheep breed. *Anim Reprod Sci*. 2009;110:139–46.
- 429 12. Demars J, Fabre S, Sarry J, Rossetti R, Gilbert H, Persani L, et al. Genome-wide  
430 association studies identify two novel BMP15 mutations responsible for an atypical  
431 hyperprolificacy phenotype in sheep. *PLoS Genet*. 2013;9:e1003482.

- 432 13. Shimasaki S, Moore RK, Otsuka F, Erickson GF. The Bone Morphogenetic Protein  
433 System In Mammalian Reproduction. *Endocr Rev.* 2004;25:72–101.
- 434 14. Nicol L, Bishop SC, Pong-Wong R, Bendixen C, Holm L-E, Rhind SM, et al.  
435 Homozygosity for a single base-pair mutation in the oocyte-specific GDF9 gene results in  
436 sterility in Thoka sheep. *Reproduction.* 2009;138:921–33.
- 437 15. Silva BDM, Castro EA, Souza CJH, Paiva SR, Sartori R, Franco MM, et al. A new  
438 polymorphism in the Growth and Differentiation Factor 9 (GDF9) gene is associated with  
439 increased ovulation rate and prolificacy in homozygous sheep. *Anim Genet.* 2011;42:89–  
440 92.
- 441 16. Mulsant P, Lecerf F, Fabre S, Schibler L, Monget P, Lanneluc I, et al. Mutation in bone  
442 morphogenetic protein receptor-IB is associated with increased ovulation rate in Booroola  
443 Mérino ewes. *Proc Natl Acad Sci USA.* 2001;98:5104–9.
- 444 17. Souza CJ, MacDougall C, MacDougall C, Campbell BK, McNeilly AS, Baird DT. The  
445 Booroola (FecB) phenotype is associated with a mutation in the bone morphogenetic  
446 receptor type 1 B (BMPR1B) gene. *J Endocrinol.* 2001;169:R1-6.
- 447 18. Wilson T, Wu XY, Juengel JL, Ross IK, Lumsden JM, Lord EA, et al. Highly prolific  
448 Booroola sheep have a mutation in the intracellular kinase domain of bone morphogenetic  
449 protein IB receptor (ALK-6) that is expressed in both oocytes and granulosa cells. *Biol*  
450 *Reprod.* 2001;64:1225–35.
- 451 19. Yan C, Wang P, DeMayo J, DeMayo FJ, Elvin JA, Carino C, et al. Synergistic roles of  
452 bone morphogenetic protein 15 and growth differentiation factor 9 in ovarian function. *Mol*  
453 *Endocrinol.* 2001;15:854–66.
- 454 20. Qin Y, Tang T, Li W, Liu Z, Yang X, Shi X, et al. Bone Morphogenetic Protein 15  
455 Knockdown Inhibits Porcine Ovarian Follicular Development and Ovulation. *Front Cell Dev*  
456 *Biol.* 2019;7:286.
- 457 21. Belli M, Shimasaki S. Molecular Aspects and Clinical Relevance of GDF9 and BMP15  
458 in Ovarian Function. *Vitam Horm.* 2018;107:317–48.
- 459 22. McNatty KP, Heath DA, Hudson NL, Lun S, Juengel JL, Moore LG. Gonadotrophin-  
460 responsiveness of granulosa cells from bone morphogenetic protein 15 heterozygous  
461 mutant sheep. *Reproduction.* 2009;138:545–51.
- 462 23. Zuchtziele. <https://www.lfl.bayern.de/itz/schwein/046844/index.php>. Accessed 26 Jun  
463 2020.
- 464 24. Warr A, Affara N, Aken B, Beiki H, Bickhart DM, Billis K, et al. An improved pig  
465 reference genome sequence to enable pig genetics and genomics research. *Gigascience.*  
466 2020;9.
- 467 25. Chang CC, Chow CC, Tellier LC, Vattikuti S, Purcell SM, Lee JJ. Second-generation  
468 PLINK: rising to the challenge of larger and richer datasets. *Gigascience.* 2015;4:7.
- 469 26. Yang J, Lee SH, Goddard ME, Visscher PM. GCTA: a tool for genome-wide complex  
470 trait analysis. *Am J Hum Genet.* 2011;88:76–82.

- 471 27. Aulchenko YS, Ripke S, Isaacs A, van Duijn CM. GenABEL: an R library for genome-  
472 wide association analysis. *Bioinformatics*. 2007;23:1294–6.
- 473 28. Li H, Durbin R. Fast and accurate short read alignment with Burrows-Wheeler  
474 transform. *Bioinformatics*. 2009;25:1754–60.
- 475 29. McKenna A, Hanna M, Banks E, Sivachenko A, Cibulskis K, Kernytsky A, et al. The  
476 Genome Analysis Toolkit: a MapReduce framework for analyzing next-generation DNA  
477 sequencing data. *Genome Res*. 2010;20:1297–303.
- 478 30. Robinson JT, Thorvaldsdóttir H, Winckler W, Guttman M, Lander ES, Getz G, et al.  
479 Integrative genomics viewer. *Nat Biotechnol*. 2011;29:24–6.
- 480 31. McLaren W, Gil L, Hunt SE, Riat HS, Ritchie GRS, Thormann A, et al. The Ensembl  
481 Variant Effect Predictor. *Genome Biol*. 2016;17:122.
- 482 32. Seabold S, Perktold J. Statsmodels: Econometric and Statistical Modeling with Python.  
483 *Proceedings of the 9th Python in Science Conference*. 2010;:92–6.
- 484 33. van Rossum G. Python library reference. 1995. <https://ir.cwi.nl/pub/5009>. Accessed 20  
485 Jun 2020
- 486
- 487

## 488 Figures

### 489 Figure 1: Genome-wide association study for atypically small vulvae in 1835 490 German Landrace sows

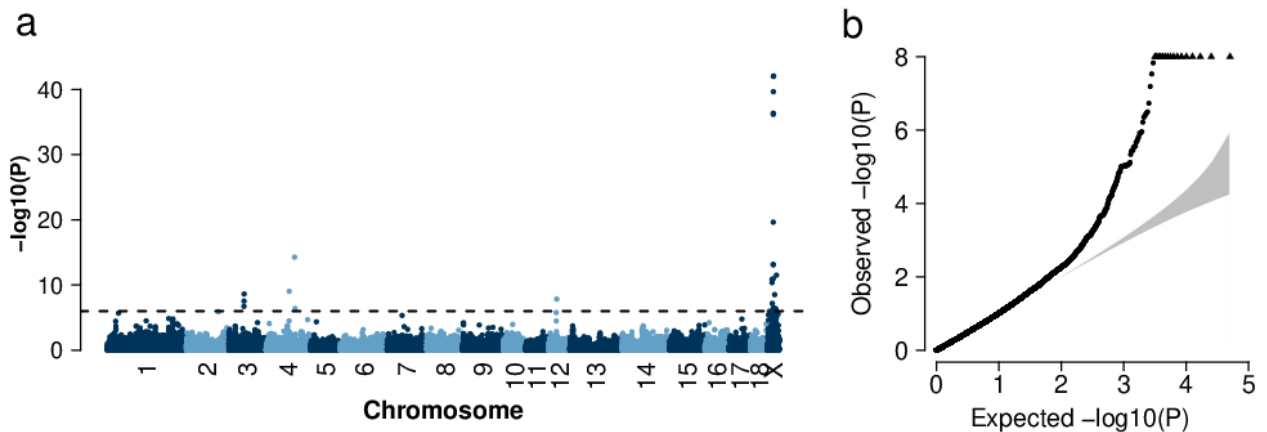

491

492 Manhattan plot (a) representing the association of 50,649 SNPs with atypically small  
493 vulvae in the German Landrace population. The dots above the dashed line represent  
494 SNPs with P-values less than  $9.87 \times 10^{-7}$  (Bonferroni corrected significance threshold) and  
495 Quantile-quantile plot (b). The grey shaded area represents the 95% concentration band  
496 under the null hypothesis of no association. Triangles represent SNPs with P-values less  
497 than  $9.87 \times 10^{-7}$ .

498

### 499 Figure 2: Uteri of 8 fullsibs at the age of 6 months

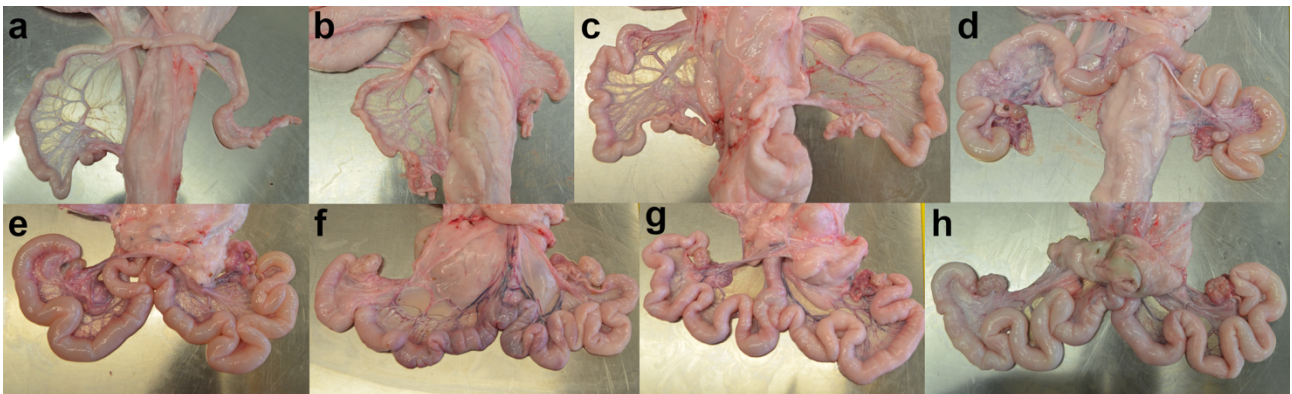

500

501 Uteri of fullsib gilts from the mating of a sow with genotype C/T of  
502 Sscrofa11.1\_X:g.44618787C>T (BMP15:R212X) and a boar carrying the T-allele. Pictures  
503 a to e show uteri of gilts with genotype T/T and pictures f to h are from sows with genotype  
504 C/T. Note that the uterus horns shown in d and e are more voluminous than in a, b and c,  
505 but less coiled than those in e, f and g.

506

507

508

509 **Figure 3: Ovaries of 8 full sibs at the age of 6 months**

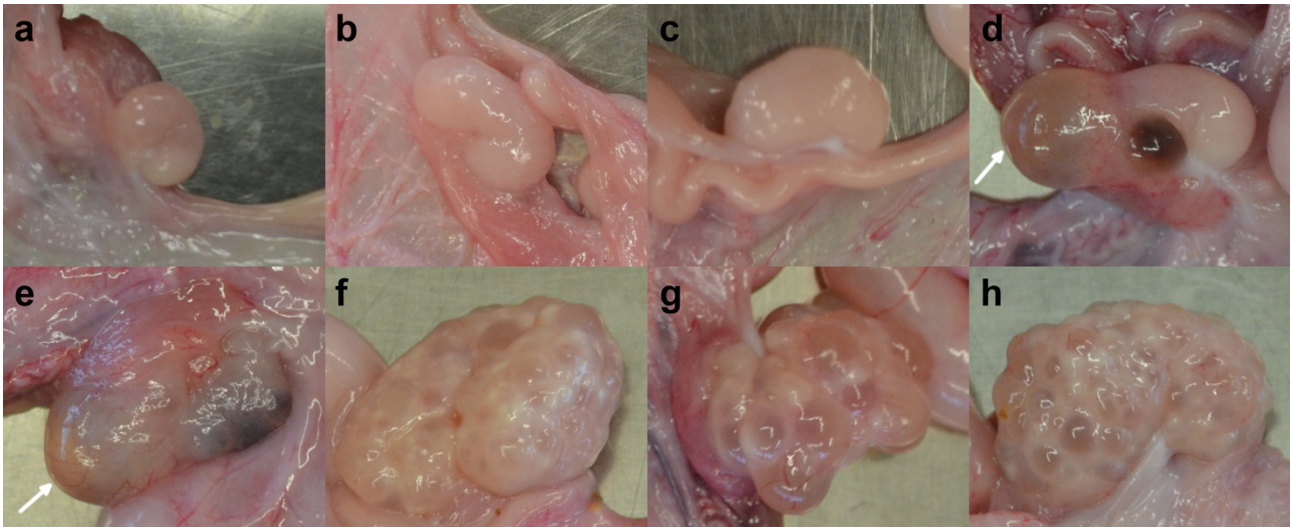

510

511 Ovaries of fullsib gilts from the mating of a sow with genotype C/T  
512 *Sscrofa11.1\_X:g.44618787C>T* (BMP15:R212X) and a boar carrying the T-allele. Pictures  
513 **a** to **e** show ovaries of gilts with genotype T/T and pictures **f** to **h** are from sows with  
514 genotype C/T. The arrows point to cysts.
